# Supplementary material
Source: Springer Nature journal article supplement (https://www.springermedizin.de/resource/supplementary/12985_2010_1092_MOESM4_ESM.pdf/9609122)

A

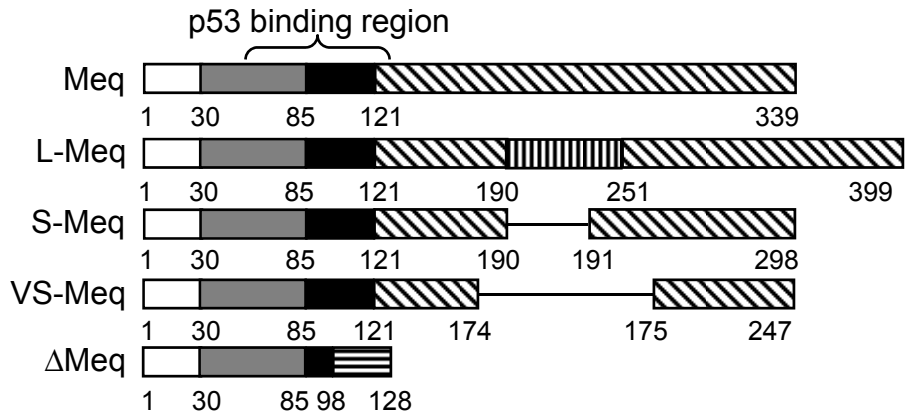

B

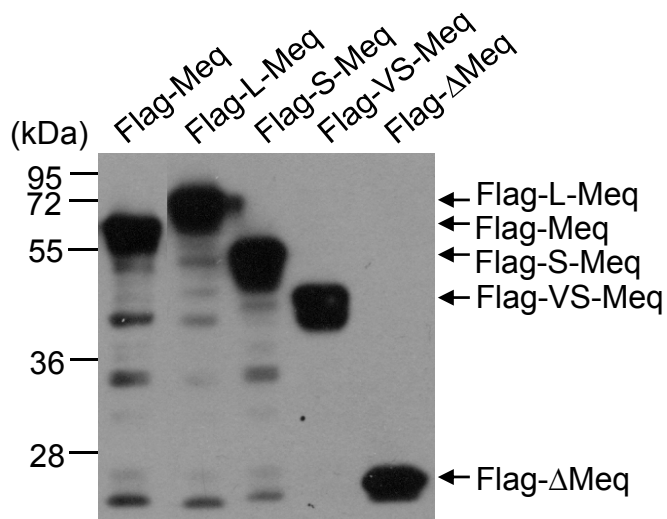

Supplement: MOESM4 [file 9609122]
